# Supplementary material
Source: Elsevier journal article supplement (https://www.sciencedirect.com/science/article/pii/S1885585718304407)
Supplement: mmc1 [file mmc1.pdf]

## MÉTODOS

### **Estimación de las medias de edad de los participantes en los estudios**

Se estimó la media de edad de los voluntarios de los artículos que no proporcionaban una media de edad de la población del estudio, pero sí el número de individuos de diferentes grupos de edad. Se asignó a todos los voluntarios de un determinado grupo etario la edad que se correspondía con el punto medio del intervalo de edad (p. ej., 29,5 años a los individuos del intervalo entre 20 y 39 años). Con estos valores y el número de individuos de cada grupo de edad, se calculó la media ponderada de la edad.

### **Determinación de la calidad de los estudios**

Para medir la calidad de los estudios, se siguió la misma estrategia utilizada por Keane et al.<sup>1</sup> en un estudio análogo. Se utilizó un *score* positivo de 8 puntos (a mayor calidad, mayor puntuación). Se obtenía 1 punto si en el texto del artículo se exponía claramente: *a)* edad y localización geográfica de los voluntarios; *b)* el método de muestreo para seleccionar los voluntarios; *c)* la tasa de respuesta del proceso de reclutamiento (> 70%); *d)* información antropométrica de las personas que no participaron en el estudio; *e)* los puntos de corte de índice de masa corporal para sobrepeso, obesidad y obesidad mórbida; *f)* el método de obtención de los datos de peso y estatura (facilitada por los pacientes o recogida por profesionales sanitarios); *g)* el nombre de los instrumentos para determinar peso y estatura, y *h)* que se habían tomado medidas para reducir el sesgo de observación (toma de medidas antropométricas por profesionales con experiencia previa, entrenamiento previo al estudio en la toma de medidas antropométricas y uso de métodos estadísticos para reducir el sesgo de observación).

Se asignó a los estudios una calidad «baja», «media» o «alta» a los trabajos con 1-4, 5-6 y 7-8 puntos respectivamente.

## **Estimación de la media de edad de la población adulta en 2006, 2016 y 2030**

El Instituto Nacional de Estadística solo proporciona los valores de edad promedio del total de la población española. En primer lugar, a partir de estos valores (disponibles en la página *web* del Instituto Nacional de Estadística<sup>2</sup>), se verificó que la media de edad se incrementó linealmente entre 1985 y 2014 de manera estadísticamente significativa ( $p < 0,001$ , tanto para varones como para mujeres). A continuación, se calculó el incremento porcentual en la media de edad de la población española que se produjo anualmente entre 1985 y 2014 (el 0,713% en los varones y el 0,650% en las mujeres). Por otro lado, se calculó la media de edad de los adultos de un punto de la serie temporal estudiada en el presente artículo. Al ser el primer punto de interés en las comparaciones del artículo y un punto en el que hay datos de una Encuesta Nacional de Salud, y al existir más estudios que publicaron datos ese año, se tomó 2006 como referencia. Ese año las medias de edad de los varones y las mujeres voluntarios analizados en los estudios del artículo fueron 45,19 y 46,49 años. Al aplicar los porcentajes de aumento de edad por año a los anteriores valores (asumiendo que la progresión siguiese siendo lineal en 2016 y 2030), se estimó que las medias de edad de la población adulta eran 48,41 y 52,92 años (varones) y 49,51 y 53,74 años (mujeres) en 2016 y 2030.

## **Estimación aproximada de los sobrecostes médicos anuales por persona en 2006, 2016 y 2030**

Se realizó una serie de presunciones para hacer una estimación aproximada de los sobrecostes médicos directos totales en la población española cada año, a partir de los datos proporcionados por Mora et al.<sup>3</sup>: los sobrecostes directos anuales por exceso de peso en varones fueron de 43,49, 84,61 y 145,64 euros/año, y 60,73, 115,83 y 170,07 euros/año en mujeres con sobrepeso (índice de masa corporal [IMC] 25,00-29,99), obesidad moderada (IMC 30,00-34,99) y obesidad grave (IMC  $\geq 35$ ) respectivamente, respecto a las personas con normopeso (IMC 18,00-24,99) y tomando el valor del euro en 2010 como referencia. En primer lugar, se asumió que los sobrecostes médicos

directos en los sujetos con obesidad no mórbida (IMC 30,00-39,99) podrían ser el promedio de los definidos para los sujetos con obesidad moderada y grave, y de esta estimación resulta que la obesidad no mórbida incrementa los costes médicos directos (respecto a las personas con normopeso) en 115,13 euros/año el de los varones y 142,95 euros/año el de las mujeres. En segundo lugar, se asumirá que los sobrecostes médicos totales de los obesos mórbidos (IMC  $\geq 40$ ) son equivalentes a los de los obesos graves, dado que se encuentran en este intervalo. Finalmente, teniendo en cuenta que en nuestras economías existe una inflación anual, hay que considerar dicho valor para dar un valor actualizado del precio del dinero de cada año. Así, según el Índice de Precios al Consumo (proporcionado por el Instituto Nacional de Estadística<sup>4</sup>), se produjo una inflación del 7,91% entre 2006 y 2010 y del 5,92% entre 2010 y 2016. Asimismo, suponiendo que entre 2016 y 2030 se podría tener un escenario de cierta estabilidad macroeconómica, se consideró una hipotética inflación anual del 2% entre 2016 y 2030 (que conduciría a una inflación acumulada del 31,9% para este intervalo de tiempo). Con estos porcentajes, los sobrecostes médicos anuales por persona para las diferentes categorías de sexo y exceso de peso (respecto a las personas con normopeso) fueron los que se indican en la tabla 1 del material suplementario.

## RESULTADOS SUPLEMENTARIOS

**Tabla 1 del material suplementario**

Estimación de sobrecostes médicos directos anuales por persona para varones y mujeres con exceso de peso en 2006, 2016 y 2030

|                                           | Varones                                |                                                  |                                                | Mujeres                                |                                                  |                                                |
|-------------------------------------------|----------------------------------------|--------------------------------------------------|------------------------------------------------|----------------------------------------|--------------------------------------------------|------------------------------------------------|
|                                           | Sobrepeso (IMC 25,00-29,99), euros/año | Obesidad no mórbida (IMC 30,00-39,99), euros/año | Obesidad mórbida (IMC $\geq$ 40,00), euros/año | Sobrepeso (IMC 25,00-29,99), euros/año | Obesidad no mórbida (IMC 30,00-39,99), euros/año | Obesidad mórbida (IMC $\geq$ 40,00), euros/año |
| 2010 (referencia <sup>2</sup> )           | 43,49                                  | 115,13                                           | 145,64                                         | 60,73                                  | 142,95                                           | 170,07                                         |
| 2006 (inflación respecto a 2010: – 7,91%) | 40,05                                  | 106,02                                           | 134,12                                         | 55,93                                  | 131,64                                           | 156,62                                         |
| 2016 (inflación respecto a 2010: +5,92%)  | 46,06                                  | 121,95                                           | 154,26                                         | 64,33                                  | 151,41                                           | 180,14                                         |
| 2030 (inflación respecto a 2016: +31,9%)  | 60,78                                  | 160,91                                           | 203,55                                         | 84,88                                  | 199,79                                           | 237,69                                         |

IMC: índice de masa corporal.

## Tabla 2 del material suplementario

Calidad de los estudios incluidos en la revisión

| Nombre de la cohorte                           | Edad, ubicación | Método de muestreo | Tasa de respuesta > 70% | Datos de no respondedores | Puntos de corte de IMC | Medida peso y estatura | Instrumentos de medida | Sesgo de observador, experiencia | Calidad     |
|------------------------------------------------|-----------------|--------------------|-------------------------|---------------------------|------------------------|------------------------|------------------------|----------------------------------|-------------|
| Estudio ENPE                                   | X               | X                  | X                       | -                         | X                      | X                      | X                      | X                                | Alta (7/8)  |
| Estudio ANIBES                                 | X               | X                  | -                       | -                         | X                      | X                      | X                      | X                                | Media (6/8) |
| Población general del País Vasco               | X               | X                  | -                       | -                         | -                      | X                      | -                      | -                                | Baja (3/8)  |
| Estudio LisRisk-ERANET                         | X               | X                  | X                       | -                         | -                      | -                      | -                      | -                                | Baja (3/8)  |
| Encuesta Nacional de Salud 2011                | X               | X                  | X                       | -                         | X                      | X                      | -                      | -                                | Media (5/8) |
| Estudio DOXA                                   | X               | -                  | -                       | -                         | X                      | X                      | -                      | -                                | Baja (3/8)  |
| Encuesta de Nutrición de la C. Valenciana 2010 | X               | X                  | -                       | -                         | X                      | X                      | -                      | -                                | Baja (4/8)  |
| Estudio Di@bet.es                              | X               | X                  | -                       | -                         | X                      | X                      | X                      | -                                | Media (5/8) |

|                                                           |   |   |   |   |   |   |   |   |             |
|-----------------------------------------------------------|---|---|---|---|---|---|---|---|-------------|
| Estudio OBEX                                              | X | X | X | - | X | X | X | X | Alta (7/8)  |
| Estudio ENRICA                                            | X | X | - | - | X | X | X | X | Media (6/8) |
| <i>European Health Interview Survey for Spain (EHISS)</i> | X | X | - | - | X | X | - | - | Baja (4/8)  |
| Farmacias, ciudad de Barcelona                            | X | - | - | X | - | X | - | - | Baja (3/8)  |
| Estudio HERMEX                                            | X | X | X | - | X | X | - | X | Media (6/8) |
| Estudio IMAP                                              | X | X | X | - | X | X | - | - | Media (5/8) |
| Encuesta de Salud de Madrid 2007                          | X | X | - | - | X | X | - | - | Baja (4/8)  |
| Estudio PREDIMERC                                         | X | X | - | - | X | X | X | - | Media (5/8) |
| Centros de Atención Primaria, Comunidad de Madrid         | X | X | X | - | X | X | - | - | Media (5/8) |

|                                      |   |   |   |   |   |   |   |   |             |
|--------------------------------------|---|---|---|---|---|---|---|---|-------------|
| Encuesta Nacional de Salud 2006      | X | X | X | - | X | X | - | - | Media (5/8) |
| Encuesta de Salud de Cataluña 2006   | X | X | - | - | X | X | - | - | Baja (4/8)  |
| Estudio EROCAP                       | X | X | X | - | - | X | - | - | Baja (4/8)  |
| Población general de Castilla y León | X | X | - | - | X | X | - | - | Baja (4/8)  |
| Población general de Galicia         | X | X | - | - | X | X | - | X | Media (5/8) |
| Estudio CANTHABRIA                   | X | X | - | - | - | X | - | - | Baja (3/8)  |
| Encuesta Nacional de Salud 2003      | X | X | X | - | X | X | - | - | Media (5/8) |
| Encuesta de Salud de Andalucía 2003  | X | - | - | - | X | X | - | - | Baja (3/8)  |
| Encuesta de Salud de Cataluña 2002   | X | - | - | - | X | X | - | - | Baja (3/8)  |
| Estudio CDC (Cohorte de Canarias)    | X | X | X | - | X | X | - | - | Media (5/8) |

|                                                            |   |   |   |   |   |   |   |   |             |
|------------------------------------------------------------|---|---|---|---|---|---|---|---|-------------|
| Población general de Cádiz                                 | X | X | X | - | X | X | - | X | Media (6/8) |
| Encuesta Nutricional de Cataluña 2002                      | X | X | - | - | X | X | X | X | Media (6/8) |
| Encuesta Nacional de Salud 2001                            | X | X | X | - | X | X | - | - | Media (5/8) |
| Población general de Segovia                               | X | X | - | - | - | X | - | - | Baja (3/8)  |
| Estudio REGICOR-2000                                       | X | X | X | - | X | X | - | X | Media (6/8) |
| Estudio CORSAIB                                            | X | X | X | - | X | X | - | - | Media (5/8) |
| Población general de Pamplona                              | X | - | - | - | X | X | - | - | Baja (3/8)  |
| Encuesta ENIB                                              | X | X | X | - | X | X | X | X | Alta (7/8)  |
| Encuesta de Riesgo Cardiovascular de la C. Valenciana 1999 | X | X | - | - | X | X | - | - | Baja (4/8)  |

|                                                        |   |   |   |   |   |   |   |   |             |
|--------------------------------------------------------|---|---|---|---|---|---|---|---|-------------|
| Población general de Girona                            | X | X | X | - | X | X | - | - | Media (5/8) |
| PAN-EU España                                          | X | X | X | - | X | X | - | - | Media (5/8) |
| Encuesta Nacional de Salud 1995-1997                   | X | X | X | - | X | X | - | - | Media (5/8) |
| Estudio SEEDO 2000                                     | X | X | X | - | X | X | - | - | Media (5/8) |
| Estudio REGICOR-1995                                   | X | X | X | - | X | X | - | X | Media (6/8) |
| Población general de Talavera de la Reina              | X | X | X | - | X | X | - | - | Media (5/8) |
| Encuesta de Salud y Nutrición de la C. Valenciana 1994 | X | X | X | - | X | X | X | X | Alta (7/8)  |
| Encuesta Nacional de Salud 1993                        | X | X | X | - | X | X | - | - | Media (5/8) |
| Población general de Albacete                          | X | - | - | - | - | X | - | - | Baja (2/8)  |

|                                       |   |   |   |   |   |   |   |   |             |
|---------------------------------------|---|---|---|---|---|---|---|---|-------------|
| Encuesta de Salud de Murcia 1992      | X | X | - | - | X | X | X | - | Media (5/8) |
| Encuesta Nutricional de Cataluña 1992 | X | X | - | - | X | X | X | X | Media (6/8) |
| Estudio Guía                          | X | X | X | - | X | X | - | - | Media (5/8) |
| Población general de Cataluña         | X | X | X | - | X | X | - | - | Media (5/8) |
| Población general de Cataluña         | X | X | X | - | X | X | - | - | Media (5/8) |
| Encuesta Nacional de Salud 1987       | X | X | X | - | X | X | - | - | Media (5/8) |

**Tabla 3**

Ecuaciones para el cálculo de las proyecciones de sobrepeso, obesidad y obesidad mórbida en varones y mujeres

| <i>Varones</i>                                                                                                  |
|-----------------------------------------------------------------------------------------------------------------|
| Prevalencia de sobrepeso = $(0,0669 \times \text{año}) + (0,652 \times \text{media de edad}) - 118,406$         |
| Prevalencia de obesidad = $(0,353 \times \text{año}) + (0,471 \times \text{media de edad}) - 711,461$           |
| Prevalencia de obesidad mórbida = $(0,0284 \times \text{año}) + (0,0172 \times \text{media de edad}) - 57,221$  |
| <i>Mujeres</i>                                                                                                  |
| Prevalencia de sobrepeso = $(0,00288 \times \text{año}) + (0,305 \times \text{media de edad}) + 10,132$         |
| Prevalencia de obesidad = $(0,169 \times \text{año}) + (0,263 \times \text{media de edad}) - 334,380$           |
| Prevalencia de obesidad mórbida = $(0,0410 \times \text{año}) + (0,00236 \times \text{media de edad}) - 81,378$ |

## BIBLIOGRAFÍA

1. Keane E, Kearney PM, Perry IJ, Kelleher CC, Harrington JM. Trends and prevalence of overweight and obesity in primary school aged children in the Republic of Ireland from 2002-2012: a systematic review. *BMC Public Health*. 2014;14:974.
2. Instituto Nacional de Estadística. Edad media de la población española según sexo. 2016. Disponible en: <http://www.ine.es/jaxiT3/Datos.htm?t=3199>. Consultado 8 Ago 2017.
3. Mora T, Gil J, Sicras-Mainar A. The influence of obesity and overweight on medical costs: a panel data perspective. *Eur J Heal Econ*. 2015;16:161-173.
4. Instituto Nacional de Estadística. Índice de Precios al Consumo. 2017. Disponible en: <http://www.ine.es/jaxiT3/Tabla.htm?t=22553&L=0>. Consultado 18 Oct 2017.
